# Supplementary material for: The Chromatin Protein DUET/MMD1 Controls Expression of the Meiotic Gene TDM1 during Male Meiosis in Arabidopsis
Source: PLoS Genet. 2015 Sep 8;11(9):e1005396. doi: 10.1371/journal.pgen.1005396 (PMC4562639; doi:10.1371/journal.pgen.1005396)
Supplement: S2 Table — (XLSX) [file pgen.1005396.s008.xlsx]

## Sheet: Sheet1
Name	Sequence 5'-3'	Application	Highlight
DUET_FG_TOPOF	CACCGAGGTAGTGGTGTATTTATCCA	cloning
DUET_FG_TOPOR	CAAAAGATAGTTTTCTTCAGG	cloning
DUET-AbA	GGATCGCATATGTCTCCTCATCAGAAGAGATCAAGCC	cloning	NdeI site
DUET-AbB	ACTACCCAAATTTGCAGCCACAGTACTATAGT	cloning
DUET-AbC	ACTATAGTACTGTGGCTGCAAATTTGGGTAGTTCGAATTGCTGTGAAGAATTTGCAG	cloning
DUET-AbD	GCTGATAAGCTTTTACAAAAGATAGTTTTCTTCAGGAAAAATC	cloning	HindIII site
DUETphdBamHI	CGGGATCCGGTGGATGTGATACATGGATGGT	cloning	BamHI
DUETphdEcoRI	GCGGAGAATTCCCGCTCTGCAAATTCTTCACAGCA	cloning	EcoRI site
pTDM1-F	GGGGACAACTTTGTATAGAAAAGTTGGCTCGCTCCTATCAGgtaata	cloning
pTDM1-R	GGGGACTGCTTTTTTGTACAAACTTGtttctttttcgattctctctgtc	cloning
DUET_dPHDF	TGGAATCAAAACTCAAGTGTCAAGGTGGATGTGATGAGCAACAGAGGAAAGTGCTGCAGCCAAAG	fusion PCR
DUET_dPHDR	ATCACATCCACCTTGACACTTGAGTTTTGATTCCAAATCTATCCCATGACCTCTCA	fusion PCR
ACT11qF	GAGGCTCCATTCTAGCATCAC	qPCR
ACT11qR	GGACTATTGATGGCCCTGAC	qPCR
DUETqF	GCTTTGTAATAGTCTCGGAGCA	qPCR
DUETqR	GCGGAAGAGAGATTGTGGACTT	qPCR
JASqF	CAGTGGATCGAGAATGAGCA	qPCR
JASqR	CCTTCTCCAGTCTCACTTCA	qPCR
MLH3qF	TCTGTTACCGTCAGAATGCTCT	qPCR
MLH3qR	GCCTTCAAATCGACAAGAGG	qPCR
OSD1qF	CACCTCTACGCGACATAACTCA	qPCR
OSD1qR	CTCAATAACTCGGCCATCGT	qPCR
PS1qF	TCGTTCTTCTTAGCAACGATGT	qPCR
PS1qR	GTGGTGTCTCGCAAATCACA	qPCR
TAMqF	CTTGTTGCAGCCTCTGCAGTT	qPCR
TAMqR	GCAACCACATCAGATGAGAGT	qPCR
TDM1qF	GTGGTAGAGTCAGTAGAGCAA	qPCR
TDM1qR	AGCCCAAGTTCCCTAGTATC	qPCR
DUETphd-C	CGAGAGGATGATATCTGCGGATGTTGCGGAGGTATGGCAAGCGACACGATGTTGTGG	sdm	mutated residues
DUETphd-S20A	GATGGCGAGAGAATGATAGCGTGTGATGTTTGTGAGGTA	sdm	mutated residue
DUETphd-W27A	GATGTTTGTGAGGTAGCGCAACATACACGATG	sdm	mutated residue
TDM1.1 For	TCAAGCCTGTGAATTTGGGGA	ChIP qPCR
TDM1.1 Rev	TGGTGTAGACCGCTGGAGAA	ChIP qPCR
TDM1.2 For	ACGAATCAGTGTCGTTGAAGAA	ChIP qPCR
TDM1.2 Rev	TACCCTTTTTGCCCCTACGTTA	ChIP qPCR
TDM1.3 For	TGTCTGGTCATGTGAGTTTTGC	ChIP qPCR
TDM1.3 Rev	CGCATCAAGCAGATTGCAAGG	ChIP qPCR
